# Supplementary material
Source: ML conference proceedings conference paper supplement (https://openreview.net/forum?id=DdSOZHNLmT)
Supplement: supplementary_material [file attachment]

# Supplementary Materials: Rethinking the One-shot Object Detection: Cross-Domain Object Search

Anonymous Authors

## 1 EXPERIMENT

**Protocol IV: Free category in each domain.** This is a newly proposed propocol. We randomly select 10 images from each style and category as query patches. Similar to Protocol III, we form a diverse gallery by selecting images from the dataset, but with the distinction that Protocol IV requires the gallery to match the style of the query. Similarly, the gallery should ideally be the entire dataset, but this is impractical to implement. Therefore, in our experiments, we randomly select 2k images for each style as the gallery.

Table 1 display the experimental results under the Protocol IV. In Protocol IV, our method achieved an increase of 2.58% in AP50 for base categories and 1.82% in AP50 for novel categories, resulting in an overall improvement of 2.39% across the entire test dataset.

**Table 1: Comparisons of CrDoOS with state-of-the-art methods on the MSOSB in terms of AP50 under the Protocol IV.**

| Method        | Protocol IV  |             |              |
|---------------|--------------|-------------|--------------|
|               | Base         | Novel       | All          |
| CoAE [2]      | 4.93         | 1.52        | 4.08         |
| AIT [1]       | 7.95         | 2.07        | 6.48         |
| BHRL [3]      | 10.74        | 2.82        | 8.76         |
| <b>CrDoOS</b> | <b>13.32</b> | <b>4.64</b> | <b>11.15</b> |

## 2 THE DETAILED INFORMATION OF MSOSB

Table 2 and Table 3 provide detailed information on the quantities and specific categories of MSOSB.

## REFERENCES

- [1] Ding-Jie Chen, He-Yen Hsieh, and Tyng-Luh Liu. 2021. Adaptive image transformer for one-shot object detection. In *Proceedings of the IEEE/CVF Conference on Computer Vision and Pattern Recognition*. 12247–12256.
- [2] Ting-I Hsieh, Yi-Chen Lo, Hwann-Tzong Chen, and Tyng-Luh Liu. 2019. One-shot object detection with co-attention and co-excitation. *Advances in neural information processing systems* 32 (2019), 1–10.
- [3] Hanqing Yang, Sijia Cai, Hualian Sheng, Bing Deng, Jianqiang Huang, Xian-Sheng Hua, Yong Tang, and Yu Zhang. 2022. Balanced and hierarchical relation learning for one-shot object detection. In *Proceedings of the IEEE/CVF Conference on Computer Vision and Pattern Recognition*. 7591–7600.

Table 2: Quantitative and category statistics of the MSOSB. (part 1)

| MSOSB    |                |         |      |             |        |       |       |
|----------|----------------|---------|------|-------------|--------|-------|-------|
|          |                | Style   |      |             |        |       | Sum   |
|          |                | cartoon | oil  | water-color | pencil | art   |       |
| Category | person         | 9292    | 2856 | 3779        | 20806  | 18247 | 54980 |
|          | bicycle        | 322     | 234  | 187         | 1130   | 859   | 2732  |
|          | car            | 600     | 800  | 370         | 3925   | 3684  | 9379  |
|          | motorcycle     | 403     | 340  | 199         | 1046   | 881   | 2869  |
|          | airplane       | 151     | 147  | 194         | 915    | 872   | 2279  |
|          | bus            | 147     | 301  | 177         | 786    | 709   | 2120  |
|          | train          | 314     | 476  | 216         | 801    | 723   | 2530  |
|          | truck          | 277     | 424  | 162         | 212    | 201   | 1276  |
|          | boat           | 429     | 222  | 236         | 1246   | 1036  | 3169  |
|          | traffic light  | 81      | 335  | 231         | 320    | 317   | 1284  |
|          | fire hydrant   | 73      | 103  | 21          | 50     | 51    | 298   |
|          | stop sign      | 507     | 493  | 280         | 32     | 43    | 1355  |
|          | parking meter  | 102     | 279  | 8           | 32     | 28    | 449   |
|          | bench          | 81      | 331  | 154         | 217    | 191   | 974   |
|          | bird           | 671     | 413  | 684         | 1495   | 1848  | 5111  |
|          | cat            | 363     | 131  | 236         | 1136   | 1102  | 2968  |
|          | dog            | 389     | 536  | 209         | 1522   | 1362  | 4018  |
|          | horse          | 241     | 431  | 395         | 972    | 901   | 2940  |
|          | sheep          | 1259    | 1286 | 129         | 1073   | 1036  | 4783  |
|          | cow            | 111     | 194  | 343         | 898    | 938   | 2484  |
|          | elephant       | 177     | 165  | 217         | 127    | 128   | 814   |
|          | bear           | 257     | 288  | 412         | 38     | 33    | 1028  |
|          | zebra          | 130     | 170  | 78          | 137    | 131   | 646   |
|          | giraffe        | 597     | 201  | 172         | 108    | 124   | 1202  |
|          | backpack       | 154     | 14   | 179         | 202    | 168   | 717   |
|          | umbrella       | 437     | 492  | 288         | 180    | 233   | 1630  |
|          | handbag        | 402     | 99   | 283         | 289    | 250   | 1323  |
|          | tie            | 108     | 57   | 26          | 119    | 120   | 430   |
|          | suitcase       | 285     | 358  | 226         | 139    | 164   | 1172  |
|          | frisbee        | 27      | 50   | 11          | 61     | 54    | 203   |
|          | skis           | 3184    | 2065 | 1981        | 99     | 142   | 7471  |
|          | snowboard      | 219     | 268  | 92          | 27     | 42    | 648   |
|          | sports ball    | 690     | 479  | 508         | 136    | 127   | 1940  |
|          | kite           | 173     | 84   | 115         | 155    | 181   | 708   |
|          | baseball bat   | 175     | 44   | 134         | 87     | 59    | 499   |
|          | baseball glove | 95      | 217  | 139         | 77     | 71    | 599   |
|          | skateboard     | 105     | 212  | 12          | 94     | 84    | 507   |
|          | surfboard      | 482     | 379  | 179         | 140    | 129   | 1309  |
|          | tennis racket  | 90      | 157  | 25          | 117    | 108   | 497   |
|          | bottle         | 517     | 735  | 607         | 2113   | 1764  | 5736  |

Table 3: Quantitative and category statistics of the MSOSB. (part 2)

| MSOSB    |              |         |       |             |        |       |       |
|----------|--------------|---------|-------|-------------|--------|-------|-------|
|          |              | Style   |       |             |        |       | Sum   |
|          |              | cartoon | oil   | water-color | pencil | art   |       |
| Category | wine glass   | 543     | 575   | 175         | 159    | 184   | 1636  |
|          | cup          | 503     | 371   | 518         | 458    | 441   | 2291  |
|          | fork         | 344     | 166   | 102         | 111    | 104   | 827   |
|          | knife        | 196     | 102   | 137         | 180    | 146   | 761   |
|          | spoon        | 392     | 267   | 248         | 135    | 118   | 1160  |
|          | bowl         | 143     | 367   | 320         | 320    | 306   | 1456  |
|          | banana       | 161     | 297   | 415         | 160    | 219   | 1252  |
|          | apple        | 268     | 661   | 779         | 109    | 130   | 1947  |
|          | sandwich     | 417     | 336   | 115         | 101    | 76    | 1045  |
|          | orange       | 156     | 701   | 399         | 148    | 139   | 1543  |
|          | broccoli     | 87      | 179   | 115         | 187    | 129   | 697   |
|          | carrot       | 269     | 641   | 679         | 180    | 191   | 1960  |
|          | hot dog      | 356     | 158   | 83          | 67     | 60    | 724   |
|          | pizza        | 288     | 184   | 180         | 176    | 109   | 937   |
|          | donut        | 256     | 292   | 230         | 179    | 159   | 1216  |
|          | cake         | 114     | 102   | 200         | 125    | 191   | 732   |
|          | chair        | 998     | 2293  | 605         | 3853   | 3797  | 11546 |
|          | couch        | 205     | 544   | 263         | 981    | 942   | 2935  |
|          | potted plant | 850     | 719   | 333         | 1540   | 1222  | 4664  |
|          | bed          | 193     | 599   | 187         | 84     | 79    | 1142  |
|          | dining table | 242     | 429   | 104         | 1071   | 1036  | 2882  |
|          | toilet       | 341     | 405   | 117         | 89     | 90    | 1042  |
|          | tv           | 334     | 16    | 39          | 935    | 974   | 2298  |
|          | laptop       | 249     | 17    | 55          | 103    | 128   | 552   |
|          | mouse        | 319     | 25    | 202         | 49     | 57    | 652   |
|          | remote       | 206     | 89    | 22          | 135    | 148   | 600   |
|          | keyboard     | 158     | 14    | 70          | 82     | 71    | 395   |
|          | cell phone   | 70      | 359   | 171         | 139    | 123   | 862   |
|          | microwave    | 223     | 24    | 48          | 25     | 30    | 350   |
|          | oven         | 106     | 224   | 205         | 71     | 72    | 678   |
|          | toaster      | 183     | 309   | 142         | 7      | 2     | 643   |
|          | sink         | 490     | 548   | 99          | 116    | 109   | 1362  |
|          | refrigerator | 209     | 335   | 122         | 66     | 60    | 792   |
|          | book         | 944     | 914   | 583         | 614    | 547   | 3602  |
|          | clock        | 81      | 190   | 61          | 135    | 128   | 595   |
|          | vase         | 545     | 919   | 387         | 127    | 150   | 2128  |
|          | scissors     | 44      | 25    | 12          | 17     | 19    | 117   |
|          | teddy bear   | 213     | 307   | 103         | 108    | 83    | 814   |
|          | hair drier   | 31      | 15    | 6           | 6      | 5     | 63    |
|          | toothbrush   | 210     | 153   | 42          | 21     | 36    | 462   |
| Sum      |              | 36054   | 32835 | 22567       | 56237  | 51751 | —     |
